# Supplementary material for: Metabolic Modeling of Pectobacterium parmentieri SCC3193 Provides Insights into Metabolic Pathways of Plant Pathogenic Bacteria
Source: MDPI journal article supplement (doi:10.3390/microorganisms7040101), 2019-04-05
Supplement: s1 [file s1]

A

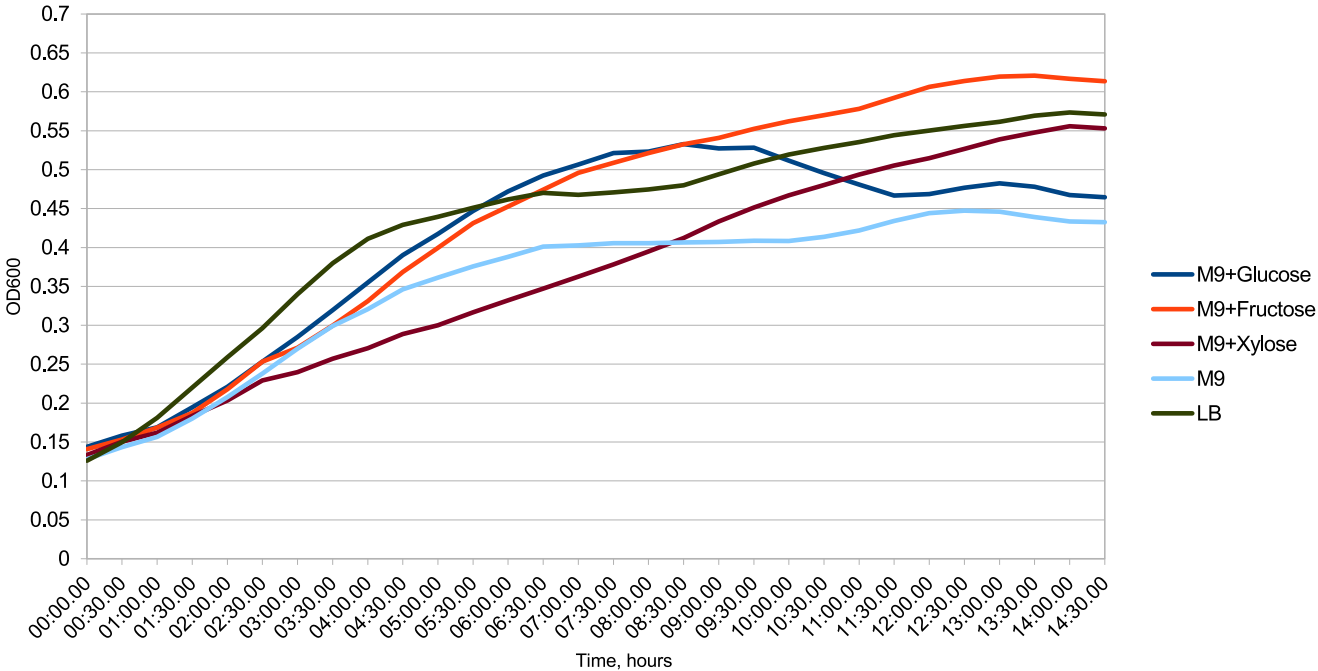

B

| C- source | Experimental Growth Rate | Simulated uptake rate | BOF value yielded Insilico |
|-----------|--------------------------|-----------------------|----------------------------|
| Glucose   | 0.00576                  | -0,03                 | 0.005                      |
| Fructose  | 0.00612                  | -0,004                | 0.006                      |
| Xylose    | 0.00548                  | -0,04                 | 0.005                      |
| M9        | 0.00634                  | -0,08                 | 0.006                      |
